# Supplementary material for: Silibinin Regulates Tumor Progression and Tumorsphere Formation by Suppressing PD-L1 Expression in Non-Small Cell Lung Cancer (NSCLC) Cells
Source: MDPI journal article supplement (doi:10.3390/cells10071632), 2021-06-29
Supplement: s1 [file s1]

**Table S1. q-PCR primer sequences and annealing temperature.**

| SI No | Gene                      | Annealing temperature (°C) | Sequence (5' - 3')                                                |
|-------|---------------------------|----------------------------|-------------------------------------------------------------------|
| 1     | SOX2                      | 58                         | F- 5'-aaccagcgcacatggacagtta-3'<br>R- 5'-cgagctggatcatggagttgt-3' |
| 2     | OCT4                      | 58                         | F- 5'-caaagcagaaaccctcgtgc-3'<br>R-5'- aaccacactcggaccacatc-3'    |
| 3     | NANOG                     | 58                         | F- 5'-accagtcccaaaggcaaaca-3'<br>R- 5'-tctgctggaggctgaggtat-3'    |
| 4     | <i>MMP2</i>               | 58                         | F: 5'-tgatggcatcgctcagatcc-3'<br>R: 5'-ggcctcgtataccgcatcaa-3'    |
| 5     | <i>MMP3</i>               | 58                         | F: 5'-cacagacctgactcgggtcc-3'<br>R: 5'-aggttctggaggacagggtt-3'    |
| 6     | <i>MMP9</i>               | 58                         | F: 5'-ggacaagctcttcggcttct-3'<br>R: 5'-tcgctggtacaggtcgagta-3'    |
| 7     | <i>VEGF</i>               | 58                         | F: 5'-aggagggcagaatcatcacg-3'<br>R: 5'-caaggccacagggttttct-3'     |
| 8     | <i>PD-L1</i>              | 58                         | F: 5'-tgccaggcattgaatctaca-3'<br>R: 5'-ggcctatttctcctcttgg-3'     |
| 9     | <i>GAPDH</i>              | 58                         | F: 5'-cccactcctccacctttgac-3'<br>R: 5'-tcctcttgctcttgctgg-3'      |
| 10    | <i>PD-L1</i> (ChIP assay) | 58                         | F: 5'-cccagctgcagcatctaagt-3'<br>R: 5'-aggccaaggccaatgtgtct-3'    |
